# Supplementary material
Source: PubMed Central journal article supplement (PMC2835146)

### Supplemental Fig. 1a

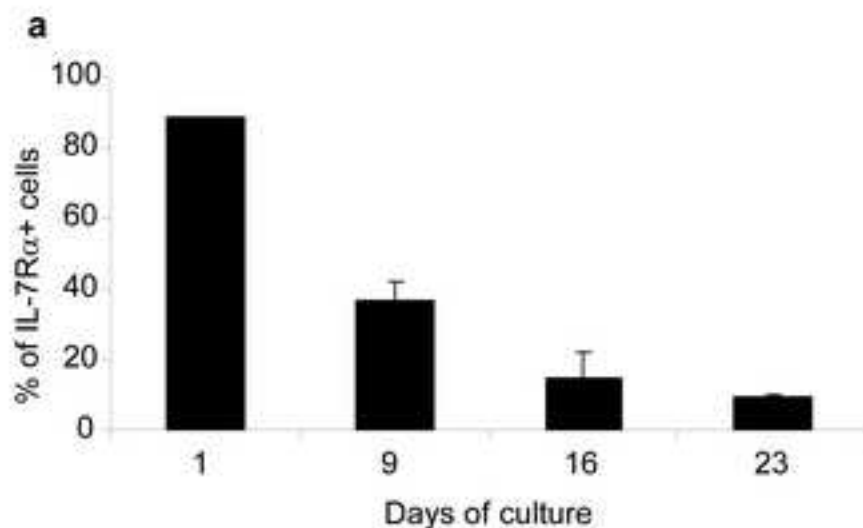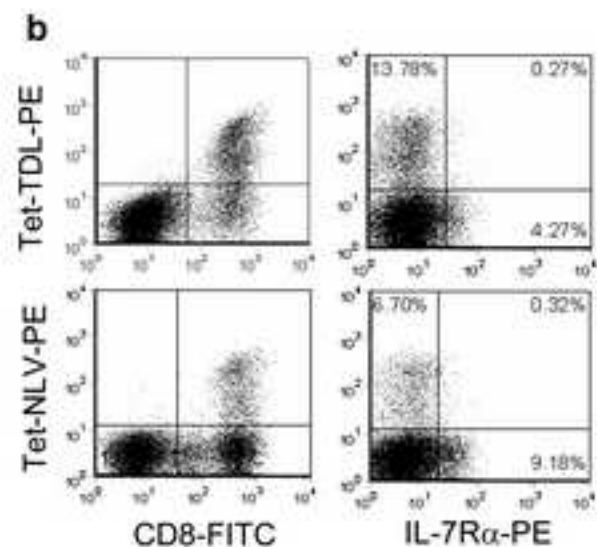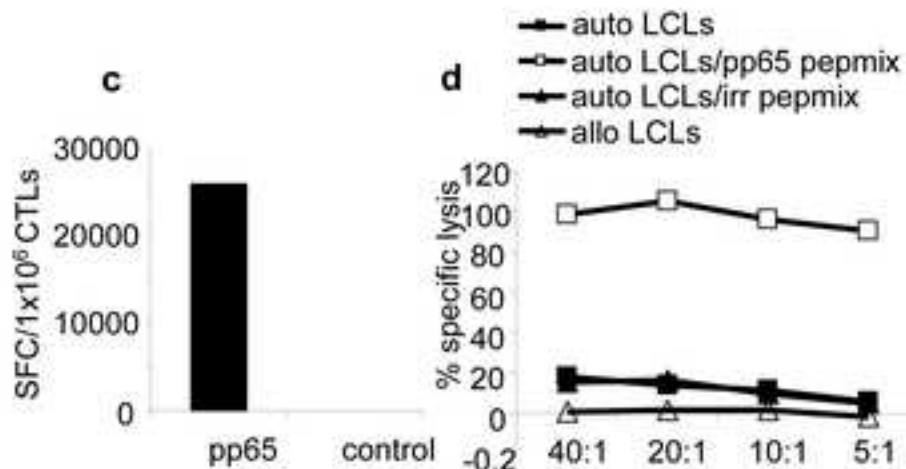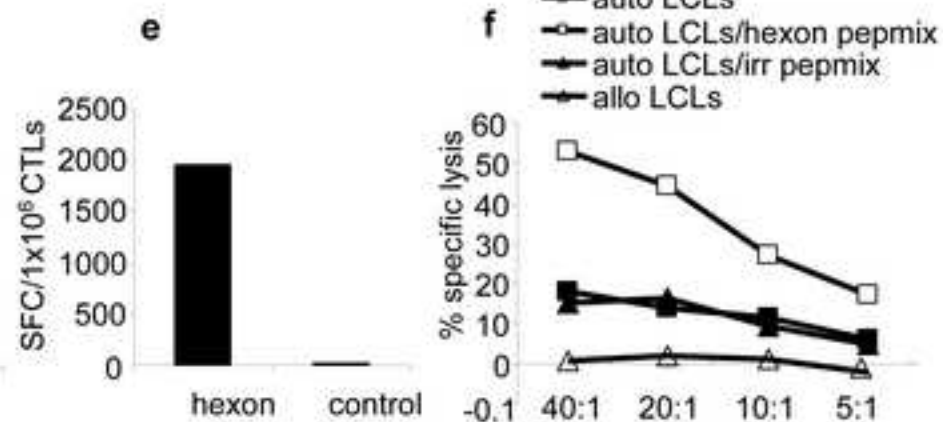

### Supplemental Fig. 1b

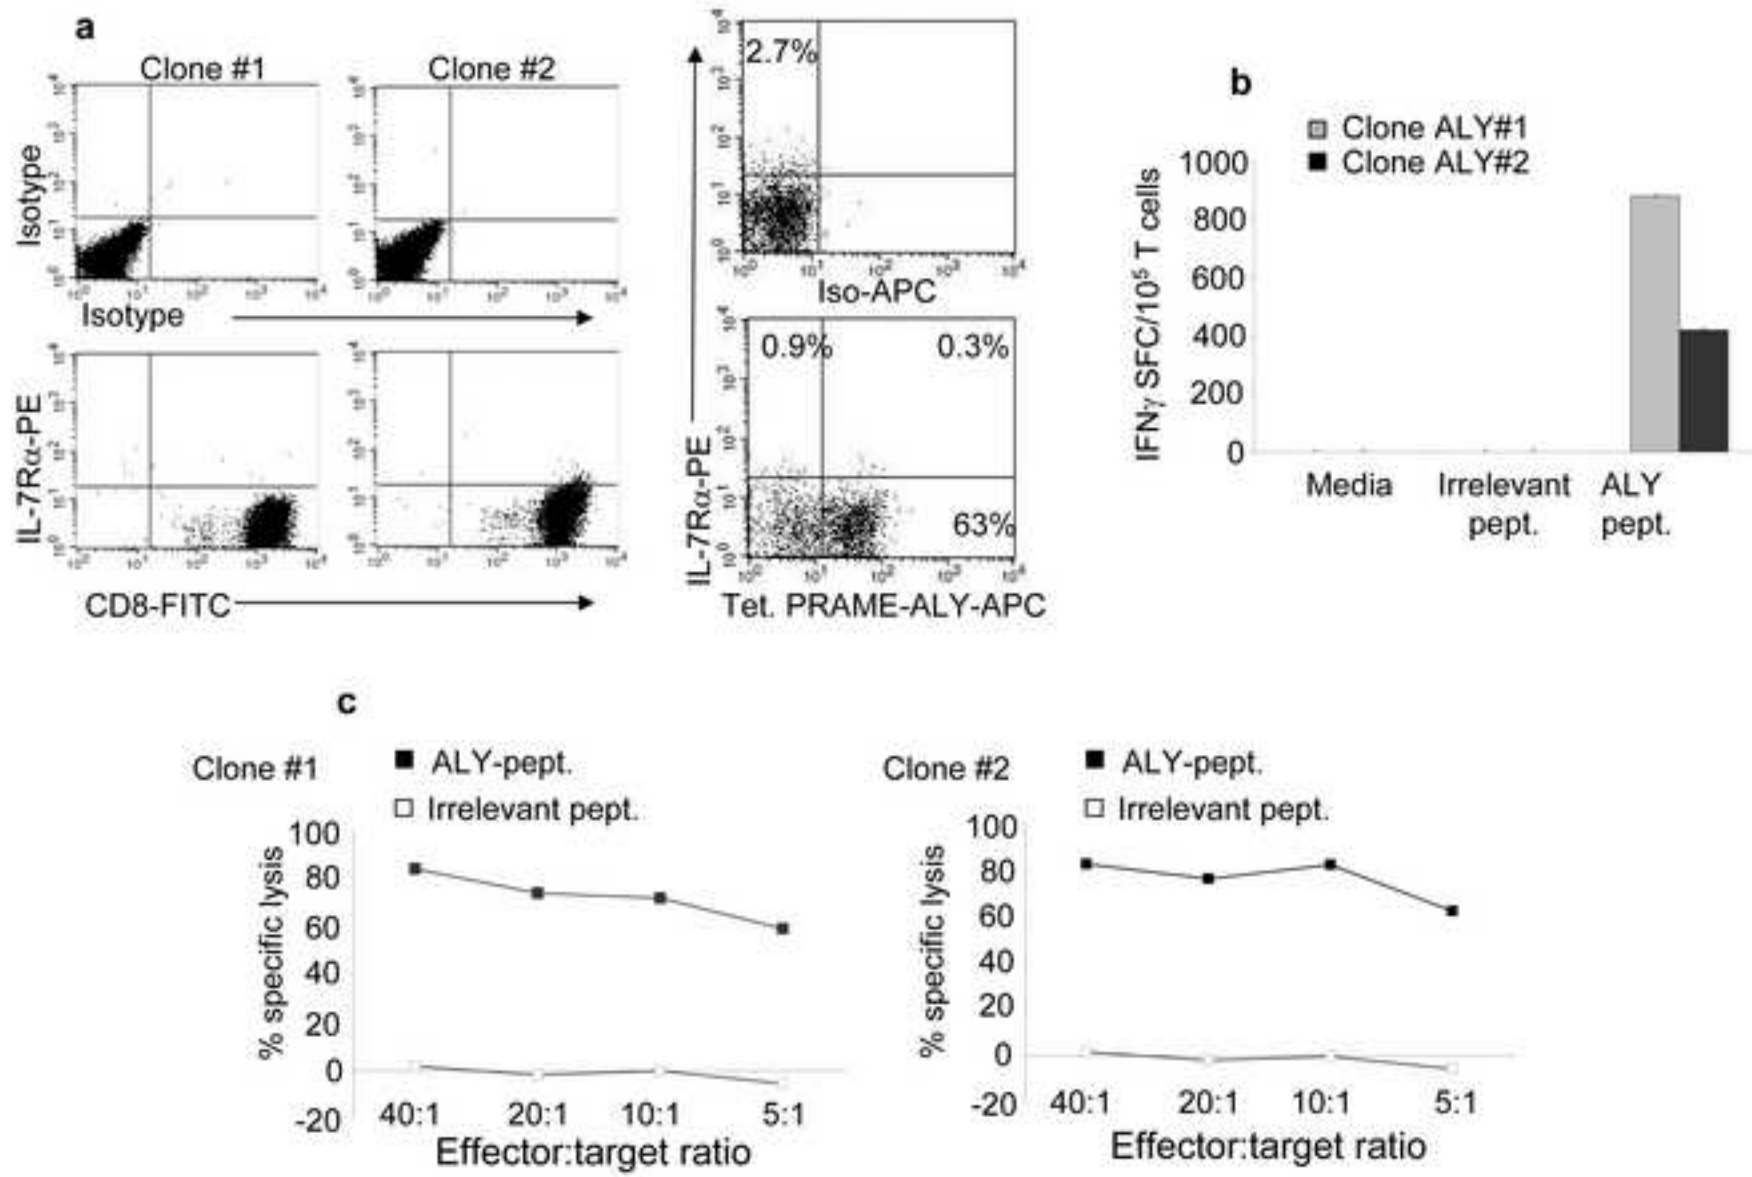

Supplement: mt200934x1.pdf [file mt200934x1.pdf]

## Supplemental Fig. 2

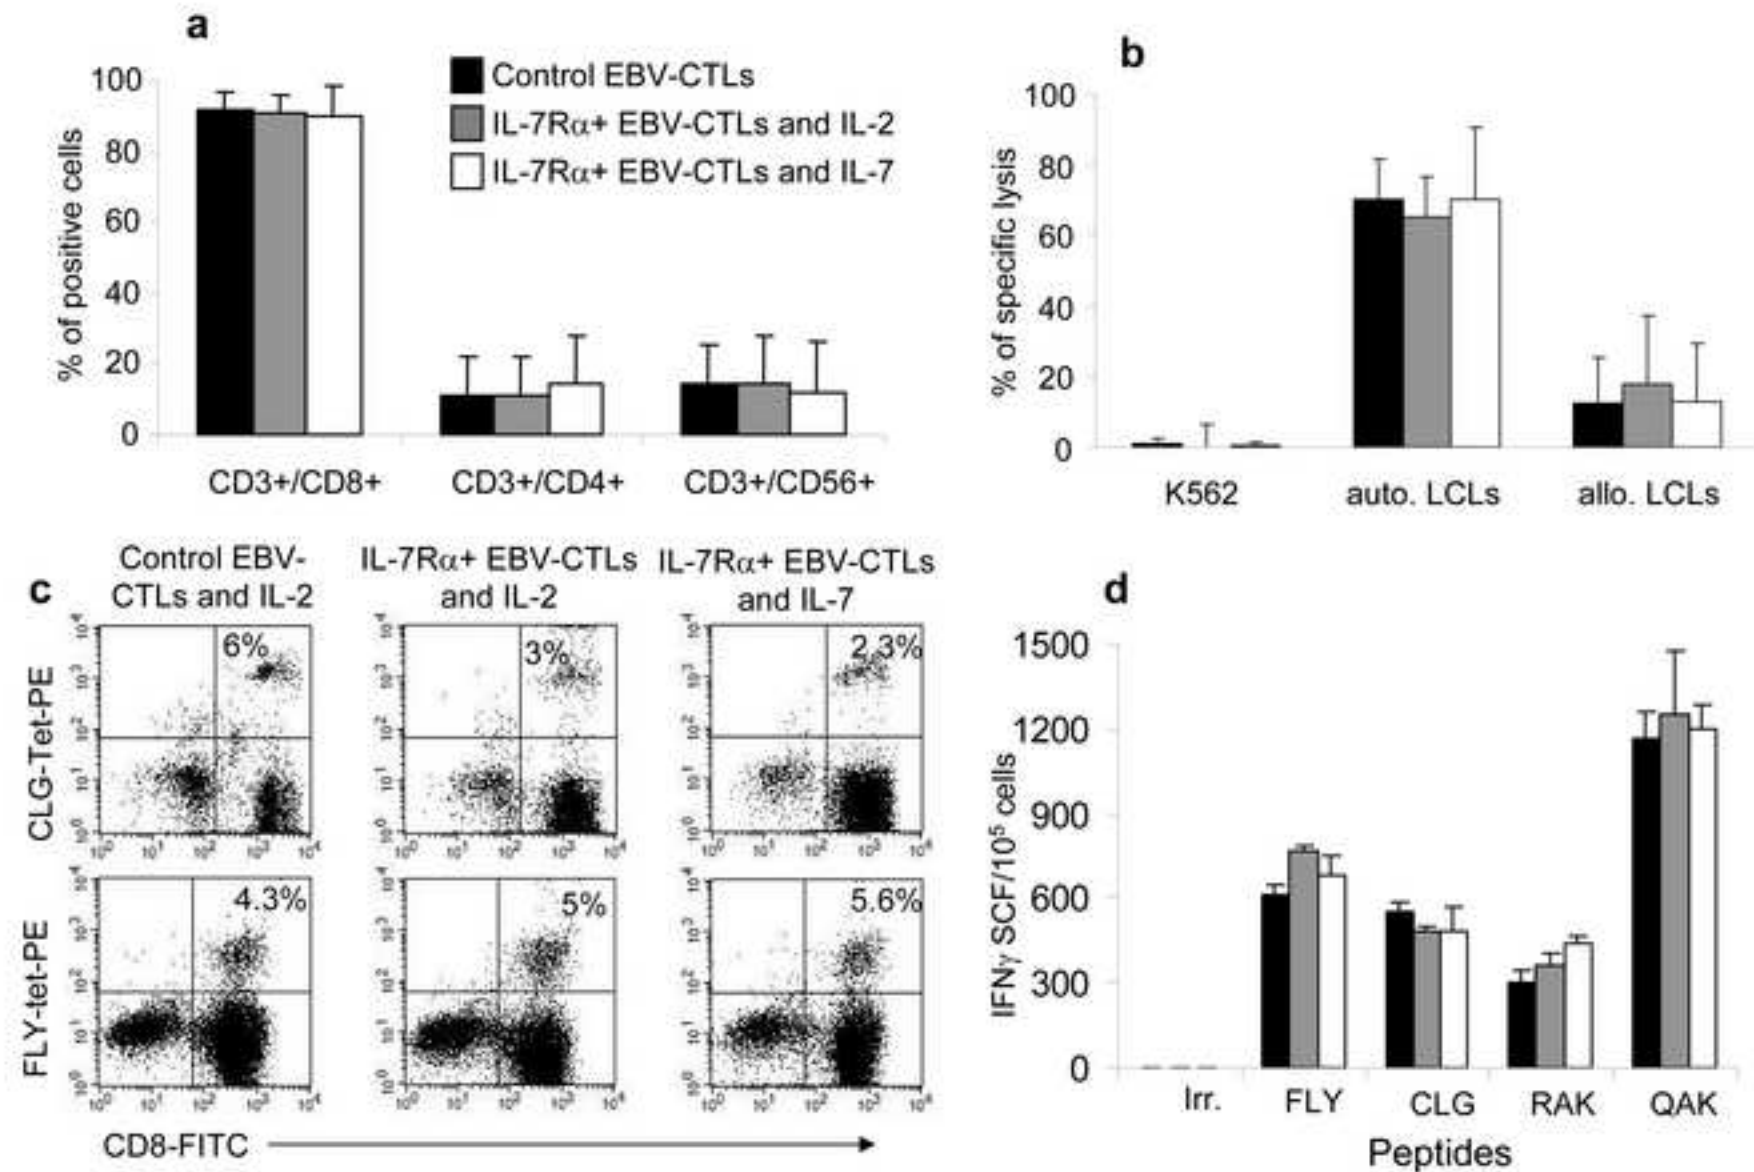

Supplement: mt200934x2.pdf [file mt200934x2.pdf]

### Supplemental Fig. 3

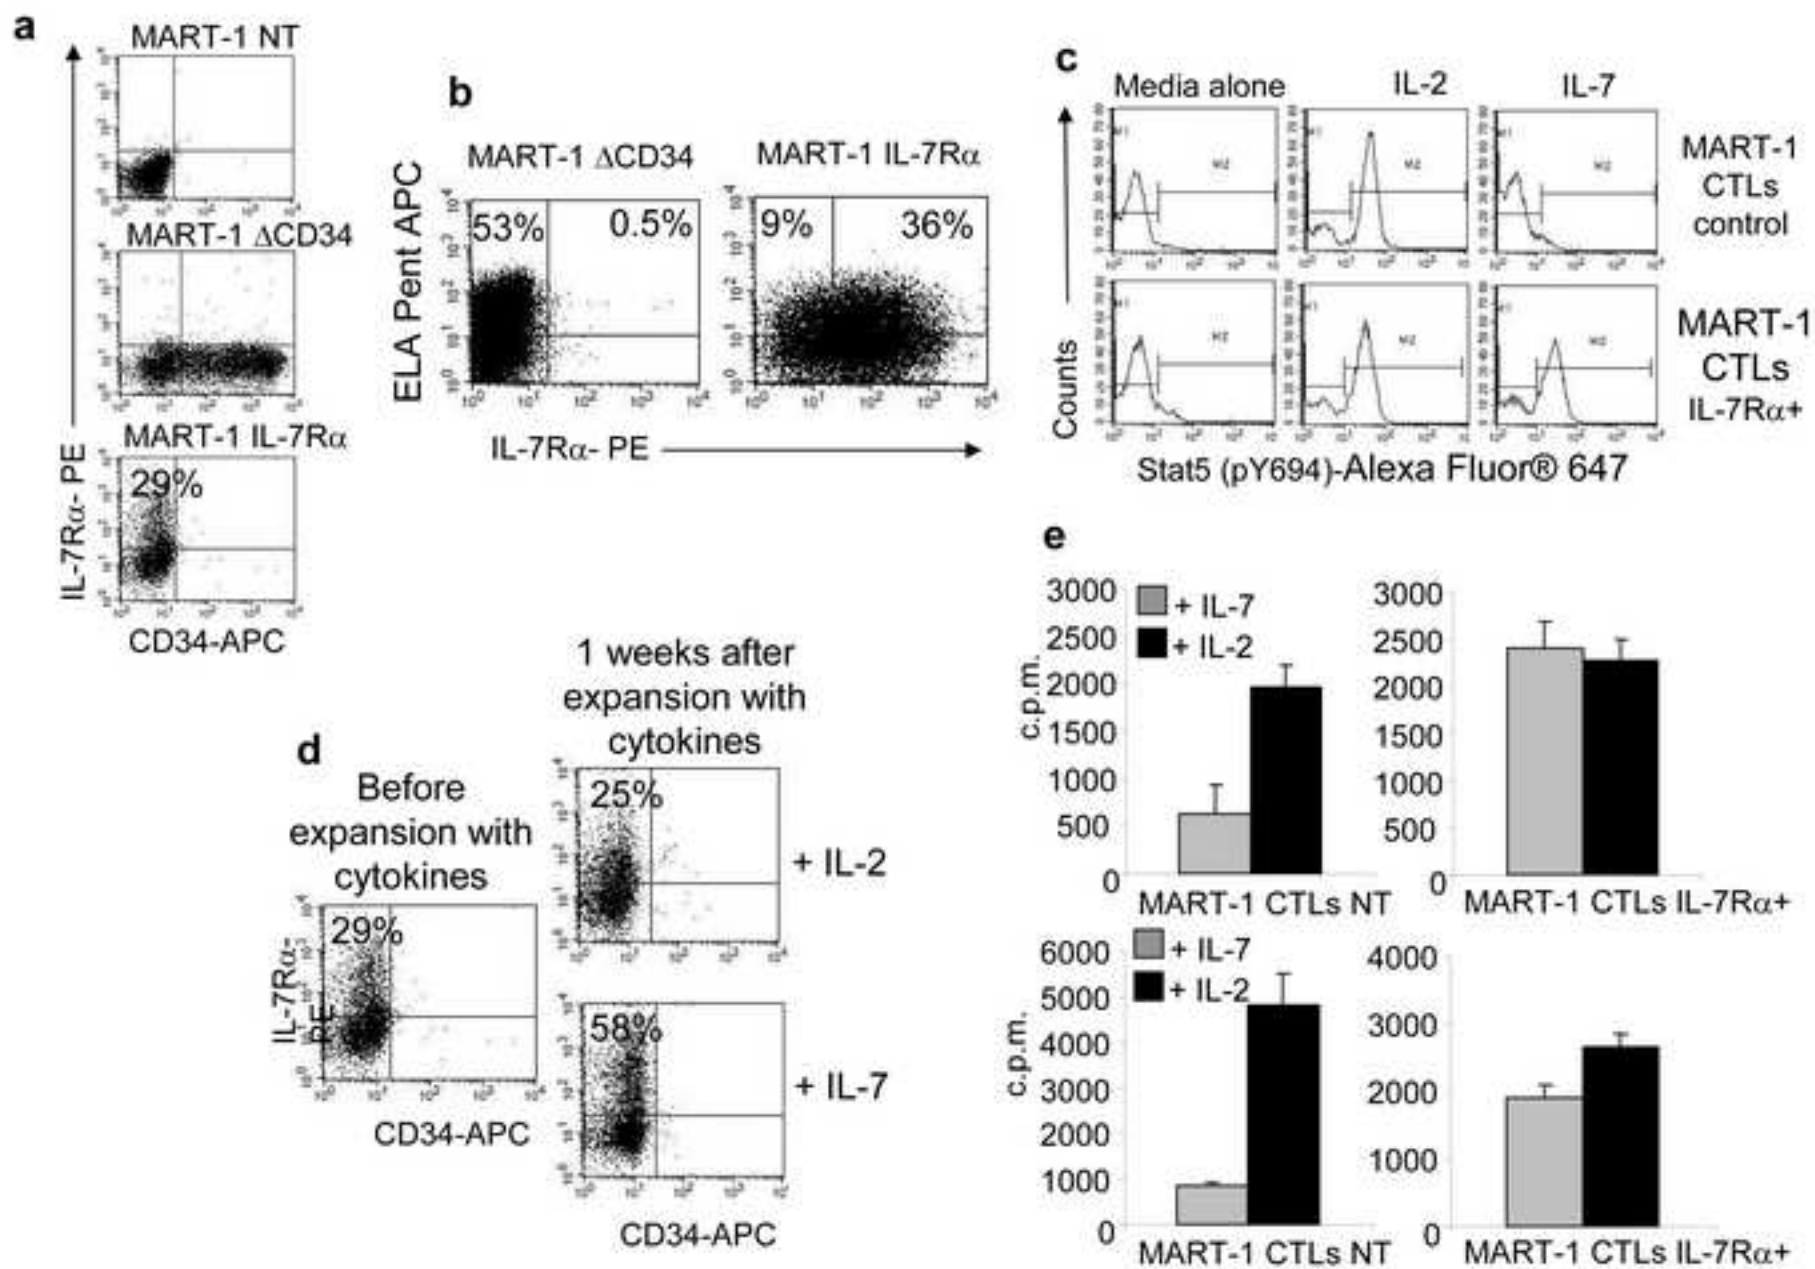

Supplement: mt200934x3.pdf [file mt200934x3.pdf]
